# Supplementary material for: MENSAJE DE NUESTRO AMADO METRATON
Source: Royal Society of Chemistry journal article supplement (doi:10.1039/c3cp44402c), 2010-01-05
Supplement: c3cp44402c.pdf [file c3cp44402c.pdf]

## Supporting Information

### Preparation of C<sub>3</sub>N<sub>4</sub>-C-1.6

8 g of cyanamide solution (aqueous, 50wt%, Shanghai Aladdin Regent Co.) dissolved in 10 g of 40% aqueous suspensions of 12-nm silica spheres (Ludox HS40, Aldrich) under vigorous stirring. The mixture was heated in an oil bath at 50 °C under stirring overnight to remove water. Next, the resultant white solid was ground in a mortar, transferred into a crucible, and heated under Ar (30 mL·min<sup>-1</sup>) at 3 °C·min<sup>-1</sup> up to 550 °C and then treated for further 4 h. Afterwards, the as-synthesized yellow powder was ground and immersed into 200 mL of NH<sub>4</sub>HF<sub>2</sub> aqueous solution (4 mol·L<sup>-1</sup>, 100 mL) for 2 d to remove the template. Then, the dispersion was centrifuged and the yellow precipitate was washed with distilled water (100 mL for each time) and ethanol (50 mL for each time) for three and two times, respectively. Finally, the yellow sample was dried at 50 °C under vacuum overnight and the mass of the obtained g-C<sub>3</sub>N<sub>4</sub> was *ca.* 1.8 g. The resulting g-C<sub>3</sub>N<sub>4</sub> samples were designated as C<sub>3</sub>N<sub>4</sub>-C-*r*, where *r* indicated the weight ratios of silica template to cyanamide.

### Characterization of C<sub>3</sub>N<sub>4</sub>-C-1.0

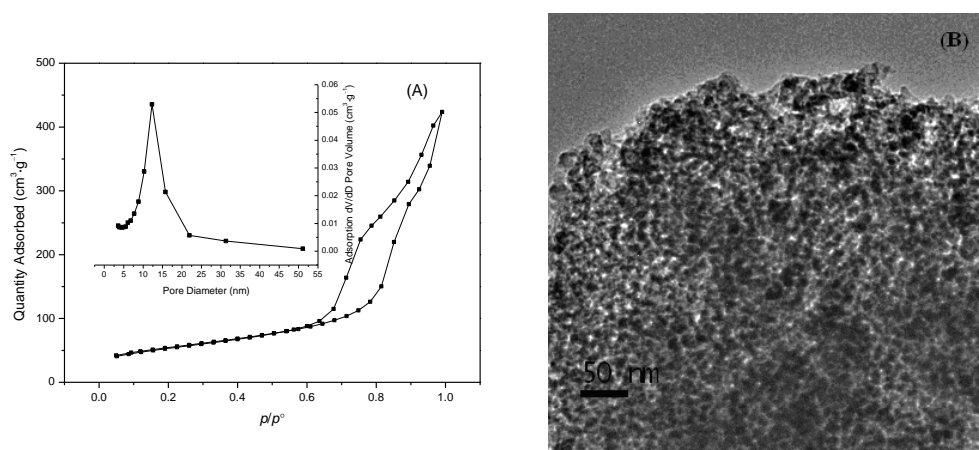

Fig. S1 N<sub>2</sub> adsorption-desorption isotherms (A) and corresponding pore size distribution (inset) and TEM image (B) of C<sub>3</sub>N<sub>4</sub>-C-1.0.
